# Supplementary material
Source: PubMed Central journal article supplement (PMC5286939)

## Implementation of erythroid lineage analysis by flow cytometry in diagnostic models for myelodysplastic syndromes

Eline M.P. Cremers,<sup>1</sup> Theresia M. Westers,<sup>1</sup> Canan Alhan,<sup>1</sup> Claudia Cali,<sup>1</sup> Heleen A. Visser-Wisselaar,<sup>2</sup> Dana A. Chitu,<sup>2</sup> Vincent H.J. van der Velden,<sup>3</sup> Jeroen G. te Marvelde,<sup>3</sup> Saskia K. Klein,<sup>4</sup> Petra Muus,<sup>5</sup> Edo Vellenga,<sup>6</sup> Georgina E. de Greef,<sup>7</sup> Marie-Cecile C.J.C. Legdeur,<sup>8</sup> Pierre W. Wijermans,<sup>9</sup> Marian J.P.L. Stevens-Kroef,<sup>10</sup> Pedro da Silva-Coelho,<sup>11</sup> Joop H. Jansen,<sup>11</sup> Gert J. Ossenkoppele<sup>1</sup> and Arjan A. van de Loosdrecht<sup>1</sup> A study on behalf of the HOVON89 study group

<sup>1</sup>Department of Hematology, VU University Medical Center, Cancer Center Amsterdam; <sup>2</sup>HOVON Data Center, Erasmus MC Cancer Institute, Clinical Trial Center, Rotterdam; <sup>3</sup>Department of Immunology, Erasmus University Medical Center, Rotterdam; <sup>4</sup>Department of Internal Medicine, Meander Medical Center, Amersfoort; <sup>5</sup>Department of Hematology, Radboud University Medical Centre, Nijmegen; <sup>6</sup>Department of Hematology, University Medical Center Groningen; <sup>7</sup>Department of Hematology Erasmus MC Cancer Institute Rotterdam; <sup>8</sup>Department of Internal Medicine, Medisch Spectrum Twente, Enschede; <sup>9</sup>Department of Internal Medicine, Haga Ziekenhuis, The Hague; <sup>10</sup>Department of Human Genetics, Radboud University Medical Centre, Nijmegen and <sup>11</sup>Laboratory of Hematology, Radboud University Medical Centre, Nijmegen, The Netherlands

©2017 Ferrata Storti Foundation. This is an open-access paper. doi:10.3324/haematol..2016.147843

Received: April 15, 2016.

Accepted: September 14, 2016.

Pre-published: September 22, 2016.

Correspondence: a.vandeloosdrecht@vumc.nl

---

## Supplementary

**Table S1 The applied 4-color (panel A) and 8-color (panel B) markers.** Per antibody CD number, (clone), and manufacturer are depicted. DAKO: DakoCytomation, Glostrup, Denmark; BD: BD Biosciences, San Jose, CA, USA. BL: BioLegend, San Diego, Ca, USA. Sanquin, Amsterdam, The Netherlands. BC: Beckman Coulter, Miami, FL, USA. IS: Immunostep, Salamanca, Spain.

**Table S1A**

|    | <b>FITC</b>                       | <b>PE</b>                     | <b>PerCP</b>            | <b>APC</b>                                            |
|----|-----------------------------------|-------------------------------|-------------------------|-------------------------------------------------------|
| 1  |                                   |                               | <b>CD45</b><br>(2D1) BD |                                                       |
| 2  | <b>CD16</b><br>(DJ130c) DAKO      | <b>CD13</b><br>(L138) BD      | <b>CD45</b>             | <b>CD11b</b><br>(D12) BD                              |
| 3  | <b>CD34</b><br>(8G12) BD          | <b>CD11b</b><br>(D12) BD      | <b>CD45</b>             | <b>HLA-DR</b><br>(L243) BD                            |
| 4  | <b>CD36</b><br>(CLB-IVC7) Sanquin | <b>CD33</b><br>(P67.6) BD     | <b>CD45</b>             | <b>CD14</b><br>(MoP9) BD                              |
| 5  | <b>CD36</b>                       | <b>CD64</b><br>(10.1) DAKO    | <b>CD45</b>             | <b>CD14</b>                                           |
| 6  | <b>CD15</b><br>(MMA) BD           | <b>CD10</b><br>(SS2/36) DAKO  | <b>CD45</b>             | <b>CD34</b><br>(8G12) BD                              |
| 7  | <b>CD34</b>                       | <b>CD117</b><br>(104D2) BD    | <b>CD45</b>             | <b>CD13</b><br>(WM15) BD<br><b>CD33</b><br>(P67.6) BD |
| 8  |                                   |                               | <b>CD45</b>             | <b>CD34</b>                                           |
| 9  | <b>CD5</b><br>(DK23) DAKO         | <b>CD19</b><br>(SJ25C1) BD    | <b>CD45</b>             | <b>CD34</b>                                           |
| 10 | <b>CD2</b><br>(MT910) DAKO        | <b>CD56</b><br>(My31) BD      | <b>CD45</b>             | <b>CD34</b>                                           |
| 11 | <b>CD13</b><br>(WM-47) DAKO       | <b>CD7</b><br>(M-T701) BD     | <b>CD45</b>             | <b>CD34</b>                                           |
| 12 | <b>CD13</b>                       | <b>CD25</b><br>(ACT-1) DAKO   | <b>CD45</b>             | <b>CD34</b>                                           |
| 13 | <b>CD71</b><br>(Ber-T9) BD        | <b>CD235a</b><br>(JC159) DAKO | <b>CD45</b>             | <b>CD117</b><br>(104D2) Dako                          |

**Table S1B**

|   | <b>FITC</b>                          | <b>PE</b>                        | <b>PerCP-Cy5.5</b>          | <b>PC7</b>                      | <b>APC</b>                    | <b>APC-H7</b>                 | <b>V450</b>                   | <b>KO</b>                   |
|---|--------------------------------------|----------------------------------|-----------------------------|---------------------------------|-------------------------------|-------------------------------|-------------------------------|-----------------------------|
| 1 |                                      |                                  | <b>CD34</b><br>(8G12)<br>BD | <b>CD117</b><br>(104D2D1)<br>BC |                               |                               | <b>HLA-DR</b><br>(L243)<br>BD | <b>CD45</b><br>(J.33)<br>BC |
| 2 | <b>CD16</b><br>(DJ130c)<br>DAKO      | <b>CD13</b><br>(L138) BD         | <b>CD34</b>                 | <b>CD117</b>                    | <b>CD11b</b><br>(D12) BD      | <b>CD10</b><br>(HI10A)<br>BD  | <b>HLA-DR</b>                 | <b>CD45</b>                 |
| 3 | <b>CD2</b><br>(MT910)<br>DAKO        | <b>CD64</b><br>(10.1)<br>DAKO    | <b>CD34</b>                 | <b>CD117</b>                    | <b>IREM2</b><br>(UP-H2)<br>IS | <b>CD14</b><br>(MoP9)<br>BD   | <b>HLA-DR</b>                 | <b>CD45</b>                 |
| 4 | <b>CD36</b><br>(CLB-IVC7)<br>Sanquin | <b>CD105</b><br>(43A3)<br>BL     | <b>CD34</b>                 | <b>CD117</b>                    | <b>CD33</b><br>(P67.6)<br>BD  | <b>CD71</b><br>(M-A712) BD    | <b>HLA-DR</b>                 | <b>CD45</b>                 |
| 5 | <b>CD5</b><br>(DK23)<br>DAKO         | <b>CD56</b><br>(My31) BD         | <b>CD34</b>                 | <b>CD117</b>                    | <b>CD7</b><br>(M-T701) BD     | <b>CD19</b><br>(SJ25C1)<br>BD | <b>HLA-DR</b>                 | <b>CD45</b>                 |
| 6 | <b>CD15</b><br>(MMA)<br>BD           | <b>CD25</b><br>(ACT-1)<br>DAKO   | <b>CD34</b>                 | <b>CD117</b>                    | <b>CD123</b><br>(9F5) BD      | <b>CD38</b><br>(HB7) BD       | <b>HLA-DR</b>                 | <b>CD45</b>                 |
| 7 | <b>CD7</b><br>(M-T701)<br>BD         | <b>CD235a</b><br>(JC159)<br>DAKO | <b>CD34</b>                 | <b>CD117</b>                    | <b>CD13</b><br>(WM15)<br>BD   | <b>CD71</b><br>(M-A712) BD    | <b>HLA-DR</b>                 | <b>CD45</b>                 |

**Table 2S Upgraded patients per WHO-Classification after addition of the erythroid evaluation.** This table provides the absolute patient counts belonging to Figure 2.

| WHO-classification | Upgrade A > B<br>'No MDS' | Upgrade B > C<br>'MDS' | C<br>'MDS'<br>after addition<br>erythroid<br>evaluation<br>(group total) |
|--------------------|---------------------------|------------------------|--------------------------------------------------------------------------|
| RA                 | 1                         | 0                      | 2 (4)                                                                    |
| RARS               | 2                         | 2                      | 16 (20)                                                                  |
| RCMD               | 1                         | 5                      | 17 (23)                                                                  |
| RCMD-RS            | 1                         | 4                      | 23 (27)                                                                  |
| RAEB-1             | 0                         | 0                      | 13 (14)                                                                  |
| Del(5q)            | 0                         | 1                      | 9 (12)                                                                   |
| MDS-U              | 0                         | 0                      | 1 (2)                                                                    |
| CMML               | 0                         | 0                      | 4 (4)                                                                    |

**Figure S1 Example of a normal bone marrow (A) and a MDS patient (B)**

Figure A provides an example of a healthy control. Figure B provides an example of a MDS patient (RCMD-RS) which has an increased percentage of erythroid progenitors (EP).

Furthermore, CD71 expression is longer retained during maturation. This is reflected in the increased CV of CD71 and CD36. Finally, the MDS patient shows a decreased MFI of CD71.

This patient scores 4 out of 4 points, revealing clear MDS specific dyserythropoiesis as assessed by FC. The dotted lines plotted in figure B are the normal reference subtracted from figure A.

A

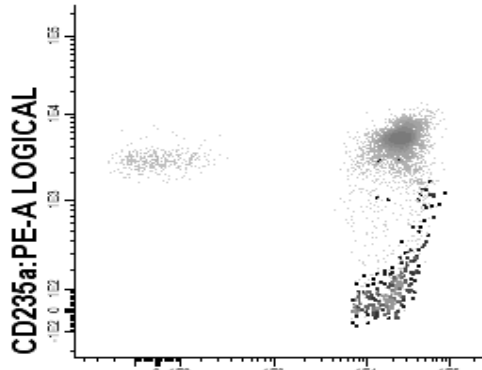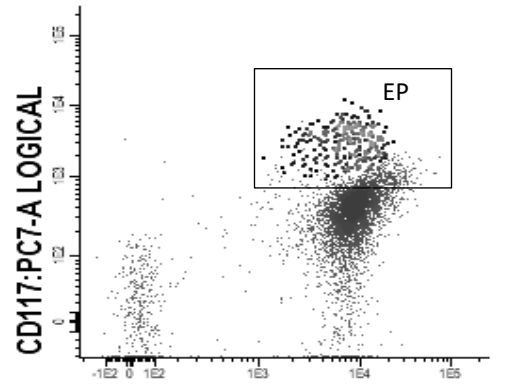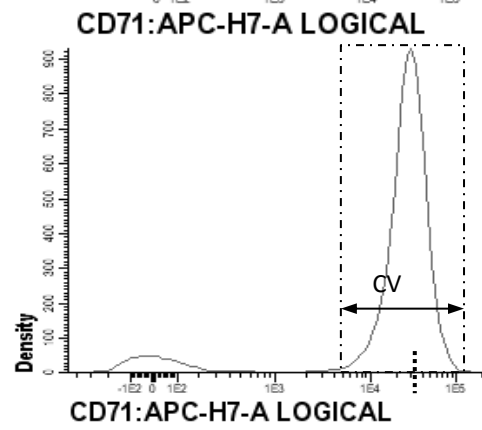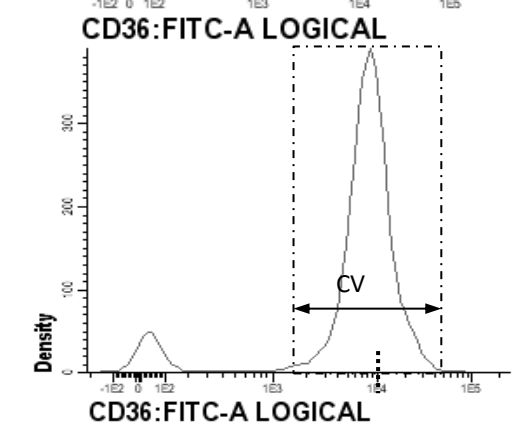

B

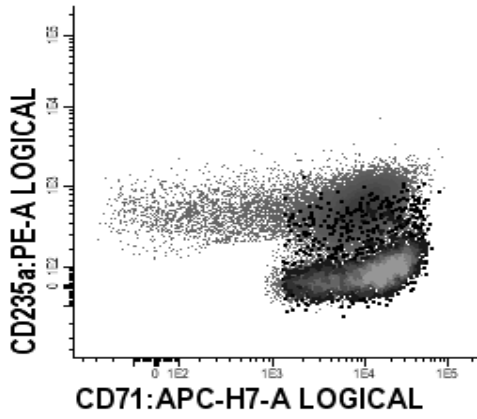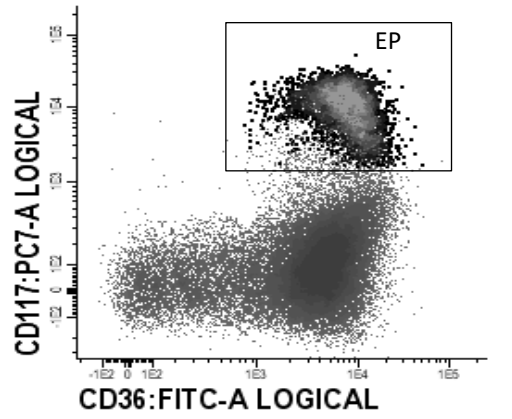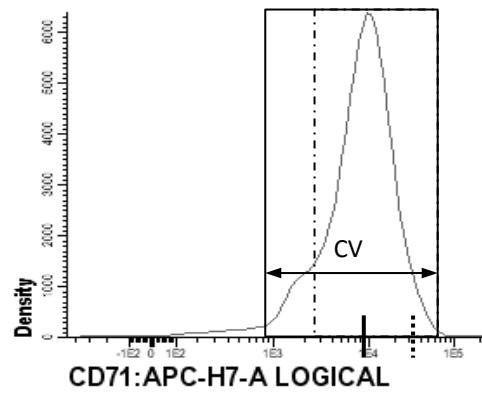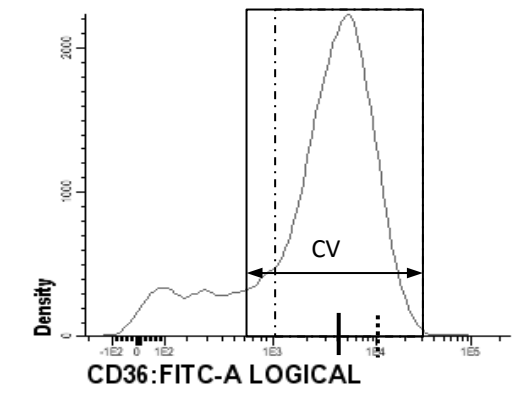

Supplement: 2016.147843.CREMES_SUPPL.pdf [file 2016.147843.CREMES_SUPPL.pdf]
