# Supplementary material
Source: PubMed Central journal article supplement (PMC5286939)
Supplement: 2016_147843-Disclosures_and_Contributions.pdf [file 2016_147843-Disclosures_and_Contributions.pdf]

Haematologica  
HAEMATOL/2016/147843  
Version 3

Implementation of erythroid lineage analysis by flow cytometry in  
diagnostic models for myelodysplastic syndromes

Eline M.P. Cremers, Theresia M. Westers, Canan Alhan, Claudia Cali,  
Heleen A. Visser-Wisselaar, Dana A. Chitu, Vincent H.J. van der  
Velden, Jeroen G. te Marvelde, Saskia K. Klein, Petra Muus, Edo  
Vellenga, Georgina E. De Greef, Marie-Cecile C.J.C. Legdeur, Pierre  
W. Wijermans, Marian J.P.L. Stevens-Kroef, Pedro da Silva-Coelho,  
Joop H. Jansen, Gert J. Ossenkoppele, and Arjan A. van de  
Loosdrecht

Disclosures: The study was supported by HOVON. The researchers received an unrestricted study grant from Celgene B.V. The Netherlands. There are no conflicts of interest.

Contributions: E.M.P.C., T.M.W., C.A., and C.C. performed the FC assessment; E.M.P.C. performed the statistical analyses; E.M.P.C., T.M.W., and A.v.d.L designed the research and wrote the paper; H.A.V-W, and D.A.C provided the clinical data from the HOVON89 trial patients; V.H.J.v.d.V. and J.G.t.M were involved in the reproducibility analysis; S.K.K, P.M, E.V, G.E.d.G., M.C.J.C.L, P.W.W., G.J.O. provided patient samples; M.J.P.L.S-K, P.SC and, J.H.J, coordinate the add-on studies to the HOVON89 trial. All co-authors discussed the format and content of the article and contributed to the review and editing of the final manuscript.
